# Supplementary material for: Influence of co-reactants on surface passivation by nanoscale hafnium oxide layers grown by atomic layer deposition on silicon
Source: Royal Society of Chemistry journal article supplement (doi:10.1039/d3lf00210a), 2023-12-07
Supplement: d3lf00210a1.pdf [file d3lf00210a1.pdf]

# Supporting Information

## **Influence of co-reactants on surface passivation by nanoscale hafnium oxide layers grown by atomic layer deposition on silicon**

Sophie L. Pain, Edris Khorani, Anup Yadav, Tim Niewelt, Antonio Leimenstoll, Brendan F. M. Healy, Marc Walker, David Walker, Nicholas E. Grant, and John D. Murphy

### Contents

|                                                                                                                                           |   |
|-------------------------------------------------------------------------------------------------------------------------------------------|---|
| S1. Thickness measurements and optical properties of $O_2$ -HfO <sub>x</sub> , $O_3$ -HfO <sub>x</sub> and $H_2O$ -HfO <sub>x</sub> ..... | 2 |
| S2. Evolution of Hf 4f peak contributions with milling duration .....                                                                     | 3 |
| References .....                                                                                                                          | 4 |

## S1. Thickness measurements and optical properties of $\text{O}_2\text{-HfO}_x$ , $\text{O}_3\text{-HfO}_x$ and $\text{H}_2\text{O-HfO}_x$

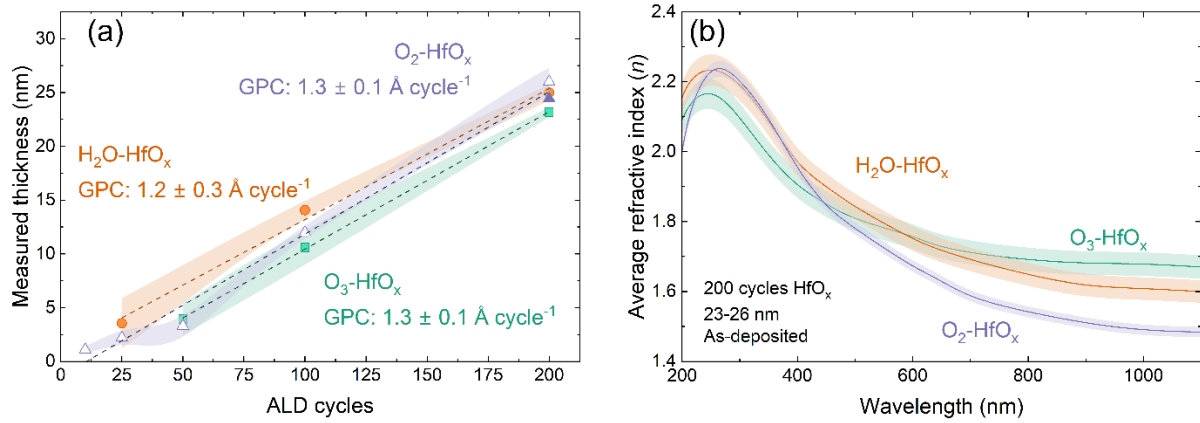

Figure 1: (a) Film thickness determined via spectral reflectivity as a function of number of ALD cycles for  $\text{HfO}_x$  on Si grown with different co-reactants ( $\text{O}_2$  plasma (purple triangles),  $\text{O}_3$  (green squares) and  $\text{H}_2\text{O}$  (orange circles) with a TDMAH precursor. Open shapes have been determined and reported previously.<sup>1-3</sup> Connections between points serve as a guide to the eye. Reported thicknesses are the average of five measurements, and the shaded region corresponds to the experienced uncertainty/variation between samples. The gradient of a line of best fit is taken as the growth per cycle (GPC). (b) Refractive indices for as-deposited  $\text{O}_2\text{-HfO}_x$  (purple),  $\text{O}_3\text{-HfO}_x$  (green) and  $\text{H}_2\text{O-HfO}_x$  (orange) as a function of wavelength. Plotted refractive indices are the average of five measurements, and the shaded region corresponds to the experienced variation across a sample.

## S2. Evolution of Hf 4f peak contributions with milling duration

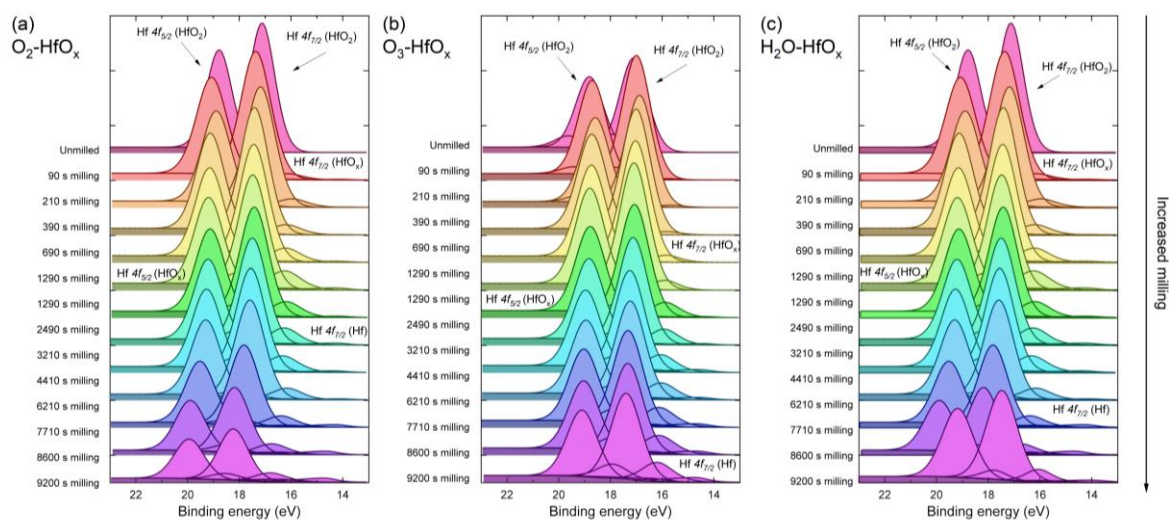

Figure S2: Deconvoluted Hf 4f XPS signal, showing  $\text{Hf } 4f_{5/2}$  and  $\text{Hf } 4f_{7/2}$  contributions for (a)  $\text{O}_2\text{-HfO}_x$ , (b)  $\text{O}_3\text{-HfO}_x$ , and (c)  $\text{H}_2\text{O-HfO}_x$  for different milling durations. Each film was  $\sim 25$  nm thick and grown through 200 ALD cycles. Following 9200 s  $\text{Ar}^+$  milling,  $< 5$  nm of  $\text{HfO}_x$  remains.

## References

1. S. L. Pain, *et al.*, *Adv. Mater. Inter.*, 2022, **9**, 2201339  
<https://doi.org/10.1002/admi.202201339>.
2. A. Wratten, *et al.*, *AIP Advances*, 2023, **13**, 065113 <https://doi.org/10.1063/5.0144639>.
3. A. Wratten, *et al.*, *IEEE J. Photovolt.*, 2023, **13**, 40-47  
<https://doi.org/10.1109/JPHOTOV.2022.3227624>.
